# Supplementary material for: Facile Process for Surface Passivation Using (NH4)2S for the InP MOS Capacitor with ALD Al2O3
Source: MDPI journal article supplement (doi:10.3390/ma12233917), 2019-11-27
Supplement: s1 [file s1]

1 Supplementary Information

2 **Facile Process for Surface Passivation Using (NH<sub>4</sub>)<sub>2</sub>S**  
 3 **for the InP MOS Capacitor with ALD Al<sub>2</sub>O<sub>3</sub>**

4 Jung Sub Lee <sup>1</sup>, Tae Young Ahn <sup>1,\*</sup> and Daewon Kim <sup>2,\*</sup>

5 <sup>1</sup> Department of Orthopaedic Surgery and Medical Research Institute, Pusan National University Hospital,  
 6 179 Gudeok-ro, Seo-gu, Busan 49241, Korea; jungsublee@pusan.ac.kr

7 <sup>2</sup> Department of Electronic Engineering, Institute for Wearable Convergence Electronics, Kyung Hee  
 8 University, 1732 Deogyong-daero, Giheung-gu, Yongin 17104, Korea

9 \* Correspondence: daewon@khu.ac.kr (D.K.); falconbleu@daum.net (T.Y.A.)

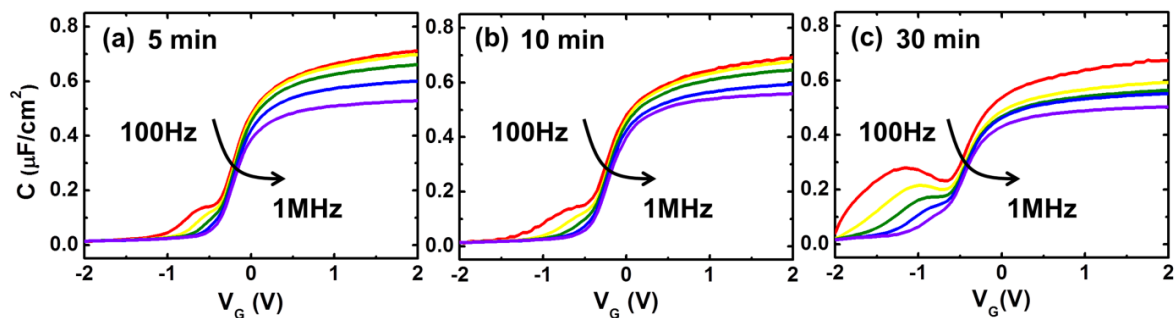

10

11 **Figure S1.** The capacitance-voltage characteristics of the Au/Ni/Al<sub>2</sub>O<sub>3</sub>/InP which was treated on 10%  
 12 (NH<sub>4</sub>)<sub>2</sub>S for (a) 5, and (b) 10, and (c) 30 min. Measurement frequencies are 100 Hz, 1 kHz, 10 kHz, 100  
 13 kHz, and 1 MHz.

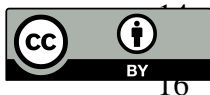

© 2019 by the authors. Licensee MDPI, Basel, Switzerland. This article is an open access article distributed under the terms and conditions of the Creative Commons Attribution (CC BY) license (<http://creativecommons.org/licenses/by/4.0/>).
